# Supplementary material for: The olfactory critical period is determined by activity-dependent Sema7A/PlxnC1 signaling within glomeruli
Source: eLife. 2021 Mar 29;10:e65078. doi: 10.7554/eLife.65078 (PMC8007213; doi:10.7554/eLife.65078)
Supplement: Figure 1—source data 1. — Six-week-old mice used in this assay were unilaterally naris-occluded at P0 and the occluded naris was reopened at P6 or P10. Mice without occlusion (–) were analyzed as controls. Mice were habituated to the cage and then a filter paper spotted with 0.5 μl of distilled water was presented for 3 min. This was repeated three times with 1 min intervals (control trials 1–3). Next, a filter paper spotted with the 1 st odor was presented three times (detection trials 4–6). Then, a filter paper spotted with the 2nd odor was presented three times (detection trials 7–9). Investigation times (s) observed during each presentation were measured. Odorant pairs examined were as follows: top, 6.2 M (+)-CAR and 6.4 M EUG; middle, 6.2 M (+)-CAR and 6.3 M (–)-CAR; and bottom, 62 mM (+)-CAR and 64 mM EUG. CAR, carvone; EUG, eugenol. The average values of investigation times are shown. [file elife-65078-fig1-data1.xlsx]

## Sheet: Fig.1B
Figure 1-source data 1
Figure 1B		Habituation/dishabituation (sec average)
	water 1	2	3	(+)-CAR 4	5	6	EUG 7	8	9
P0~6	0.733333	0.933333	1.13333	4.46667	1.2	0.933333	7.2	1.73333	0.933333
P0~10	0.75	0.916667	0.666667	3	1.25	1	3.83333	1.66667	0.416667
(-)	0.7	0.9	0.7	4.4	1	0.9	7.9	1.7	1.3
	water 1	2	3	(+)-CAR 4	5	6	(-)-CAR 7	8	9
P0~6	0.733333	0.866667	0.533333	4.66667	1.06667	0.866667	3.93333	0.933333	0.733333
P0~10	1.08333	0.916667	1.08333	2.66667	1.08333	1	1.08333	1.5	1.08333
(-)	0.6	0.9	1.1	4.8	1.2	1	4.9	1.8	0.5
	water 1	2	3	(+)-CAR(1/100) 4	5	6	EUG(1/100) 7	8	9
P0~6	0.733333	0.933333	0.6	3.93333	1.26667	1	4.8	1.73333	1.13333
P0~10	1.08333	1	0.583333	1.75	0.666667	0.75	1.25	1.25	1.08333
(-)	0.6	0.9	1	3.9	1.3	1	5.4	2.1	1.1
