# Supplementary material for: The olfactory critical period is determined by activity-dependent Sema7A/PlxnC1 signaling within glomeruli
Source: eLife. 2021 Mar 29;10:e65078. doi: 10.7554/eLife.65078 (PMC8007213; doi:10.7554/eLife.65078)
Supplement: Figure 2—source data 1. — Mice were habituated to the cage and then a filter paper spotted with 0.5 μl of distilled water was presented for 3 min. This was repeated three times with 1 min intervals (control trials 1–3). Then, a filter paper spotted with 0.5 μl of 20 mM VNL or 6.4 M eugenol (EUG) was presented three times (detection trials 4–6). Investigation times (s) observed during each presentation were measured. Mice were conditioned to VNL at P2~4 or P9~11, and were analyzed as adults at 6 weeks (6w). Mice without VNL conditioning (–) were analyzed as controls. Odorants with 10−3 dilution were also analyzed. The average values of investigation times are shown. [file elife-65078-fig2-data1.xlsx]

## Sheet: Fig.2
Figure 2-source data 1
Figure 2		Habituation/dishabituation (sec average)
VNL
	water 1	2	3	VNL 4	5	6		water 1	2	3	VNL(1/1000) 4	5	6
P2~4	0.6	0.4	0.6	4.8	4	2.6		1	0.8	1.2	4.4	2.8	1.4
P9~11	1.16667	1	1.16667	4	2	0.833333		1.33333	1	0.666667	2	0.833333	0.833333
(-)	1.42857	1.14286	1.28571	3.85714	1.28571	1		1.14286	0.857143	1	1.85714	1.85714	0.714286
EUG
	water 1	2	3	EUG 4	5	6		water 1	2	3	EUG(1/1000) 4	5	6
P2~4	0.6	0.6	0.8	5.2	1.6	1.4		1.4	0.8	1	2	1	1
P9~11	0.666667	1	0.666667	5.33333	2.33333	1.83333		1.5	1	1.16667	2	1.33333	1.16667
(-)	1.14286	1	0.857143	5.14286	1.28571	1		1.71429	1.14286	1.42857	1.85714	1.71429	1.42857
