# Supplementary material for: The olfactory critical period is determined by activity-dependent Sema7A/PlxnC1 signaling within glomeruli
Source: eLife. 2021 Mar 29;10:e65078. doi: 10.7554/eLife.65078 (PMC8007213; doi:10.7554/eLife.65078)
Supplement: Figure 3—figure supplement 2—source data 1. — The mice conditioned to VNL (P2~4) and unconditioned (–) were analyzed. M/T cells at P4 were visualized by Lucifer yellow (LY) injection into the glomeruli (Figure 3—figure supplement 2). Intracellular LY injection was performed as previously described (Inoue et al., 2018). The numbers of M/T cells with one dendrite (mature) and those with multiple dendrites (immature) were counted in the MOR29A glomeruli. The ratios (%) of mature (dark blue) and immature (cyan) M/T cells are shown: VNL-cond., 12/17 (70.6 %); VNL-uncond., 4/16 (25.0 %). n = 6, 5 glomeruli. [file elife-65078-fig3-figsupp2-data1.xlsx]

## Sheet: Fig.3B
Figure 3-source data 1
Figure 3B	Dendrite selection
VNL-cond.	P2~4	(-)
mature/total cells	12/17 (70.6 %)	4/16 (25.0 %)
