# Supplementary material for: The olfactory critical period is determined by activity-dependent Sema7A/PlxnC1 signaling within glomeruli
Source: eLife. 2021 Mar 29;10:e65078. doi: 10.7554/eLife.65078 (PMC8007213; doi:10.7554/eLife.65078)
Supplement: Figure 4—source data 1. — Individual glomeruli possess unique but different levels of Sema7A expression determined by intrinsic activity of ORs, forming the glomerular rank of Sema7A expression. OB sections were immunostained with anti-Sema7A antibodies. Intensities of Sema7A signals were determined for each glomerulus and plotted in order. Glomerular rank of fluorescent signals is shown for 437 different glomeruli in the OB at P8. Expression levels of Sema7A are indicated for the rI7, MOR29A, VNL-stimulated (P5~7) MOR29A, and CNG- rI7 glomeruli. [file elife-65078-fig4-data1.xlsx]

## Sheet: Fig.4B
Figure 4-source data 1
Figure 4B	Glomerular rank
intensity/back	OR
34
34	rI7 (Olr226)
33
31.875
31.625
31.5
31
30.875
28.625
28.3333
28.3333
27
27
27
25.5
25.4444
24.7778
24.75
24.75
24.3333
24.125
23.625
23
22.625
22
22
21.375
21
20.25
19.875
18.5556
17.375
17.375
16.625
16.3333
16.2222
16.125
15.5556
15.5556
15.25
15.25
15.1111
14.875
14
13.875
13.6667
13.6667
13.6667
13.625
13.3333
13.2222
13.1111
13.1111
13
13
13
12.6667
12.625
12.5
12.4444
12.3333
12.3333
12.25
12.2222
12.1111
12
11.8889
11.75
11.6667
11.1111
11.087
11.087
11
11
11
10.6667
10.6667
10.6667
10.6667
10.6667
10.4583
10.4444
10.4167
10.375
10.2222
10.2222
10.2083
10.125
10.125
10.1111
10.1111
10.1111
10
10
10
9.875
9.77778
9.66667
9.55556
9.55556
9.54167
9.375
9.375
9.33333
9.33333
9.14815
9.14815
8.92593	MOR29B (Olfr1511)
8.875
8.875
8.875
8.77778
8.75
8.66667
8.66667
8.66667
8.625
8.625
8.55556
8.5
8.44444
8.44444
8.44444
8.41667
8.375
8.33333
8.33333
8.33333
8.33333
8.30435
8.11111
8.11111
8.08696
8.07407
8
8
8
8
8
7.96875
7.96875
7.96875
7.96875
7.95652
7.90625
7.88889
7.77778
7.77778
7.72727
7.72727
7.72727
7.72727
7.6875
7.66667
7.66667
7.66667
7.66667
7.66667
7.625	VNL-stimulated MOR29A (Olfr1510)
7.57576
7.5
7.4375
7.375
7.33333
7.11111
7.08333
7
6.95652
6.90625
6.875
6.66667
6.66667
6.66667
6.66667
6.625
6.625
6.55556
6.34375
6.33333
6.33333
6.33333
6.22222
6.13044
6.11111
6
6
6
6
5.95652
5.88889
5.82609
5.77778
5.70833
5.66667
5.66667
5.66667
5.62963
5.625
5.55556
5.53333
5.47826
5.46667
5.46667
5.44444
5.375
5.375
5.33333
5.33333
5.33333
5.3125
5.3125
5.3125
5.3125
5.22222
5.22222
5.15556
5.14583
5.125
5	MOR29A (Olfr1510)
5
5
4.96296
4.91667
4.89583
4.88889
4.875
4.86667
4.82222
4.81818
4.77778
4.66667
4.66667
4.66667
4.66667
4.66667
4.625
4.625
4.625
4.57778
4.55556
4.55556
4.55556
4.5
4.44444
4.43478
4.375
4.375
4.22222
4.22222
4.21739
4.13333
4.11111
4.11111
4.08696
4
4
4
3.96296
3.96296
3.93333
3.85185
3.8
3.79167
3.78125
3.77778
3.77778
3.77778
3.77778
3.75556
3.66667
3.66667
3.65217
3.64444
3.62222
3.58333
3.52083
3.5
3.48148
3.48148
3.45833
3.44444
3.34375
3.33333
3.25
3.25
3.11111
3.11111
3.0625
3
3
3
3
2.88889
2.88889
2.84849
2.84615
2.77778
2.77778
2.75
2.75
2.73913
2.72727
2.66667
2.64444
2.63636
2.61538
2.6087
2.5625
2.53846
2.5
2.48148
2.46154
2.46154
2.44444
2.44444
2.44444
2.42222
2.40625
2.375
2.29167
2.26667
2.23529
2.17778
2.15385
2.125
2.125
2.11765
2.09091
2.07407
2.07407
2.04444
2.04348
2.04167
2
1.9375
1.92308
1.88889
1.88889
1.87879
1.875
1.875
1.875
1.875
1.85417
1.85417
1.84615
1.77778
1.76923
1.76471
1.75758
1.75
1.70833
1.7
1.66667
1.66667
1.65217
1.625
1.625
1.625
1.61539
1.6087
1.6
1.58824
1.54167
1.53846
1.53846
1.5
1.48485
1.47917
1.45833
1.44444
1.42424
1.39394
1.38889
1.38461
1.38461
1.38461
1.38461
1.38461
1.33333
1.28889
1.25
1.25
1.25	rI7 (Olr226) (CNG-)
1.23529
1.22222
1.22222
1.22222
1.2
1.17647
1.16667
1.16667
1.16667
1.16667
1.15625
1.15625
1.125
1.11111
1.11111
1.11111
1
0.96875
0.96875
0.958333
0.923077
0.888889
0.888889
0.854167
0.84375
0.8125
0.777778
0.75
0.722222
0.705882
0.666667
0.645833
0.615385
0.6
0.555556
0.541667
0.5
0.5
0.5
0.444444
0.375
0.333333
0.25
0.25
0.222222
0.222222
0.166667
0.125
0.111111
0
0
0
