# Supplementary material for: The olfactory critical period is determined by activity-dependent Sema7A/PlxnC1 signaling within glomeruli
Source: eLife. 2021 Mar 29;10:e65078. doi: 10.7554/eLife.65078 (PMC8007213; doi:10.7554/eLife.65078)
Supplement: Figure 5—source data 1. — M/T cells at P5 were visualized by Lucifer yellow (LY) injection into the glomeruli (Figure 3—figure supplement 2). Intracellular LY injection was performed as previously described (Inoue et al., 2018). The numbers of M/T cells with one dendrite (mature) and those with multiple dendrites (immature) were counted in the MOR29A glomeruli. The ratios of M/T cells with one primary dendrite (mature) and those with multiple branched dendrites (immature) are compared in the rI7 glomeruli: CNG+, 14/17 (82.3 %); CNG-, 3/14 (21.4 %) in (A), Tg-Sema7A, CNG+, 15/18 (83.3 %); Tg-Sema7A, CNG-, 13/16 (81.3 %) in (B), and Tg-Sema7A (Y213S), CNG+, 3/13 (23.0 %); Tg-Sema7A (Y213S), CNG-, 2/9 (22.2 %) in (C). [file elife-65078-fig5-data1.xlsx]

## Sheet: Fig.5
Figure 5-source data 1
Figure 5	Dendrite selection
A
	CNG+	CNG-
mature/total cells	14/17 (82.3 %)	3/14 (21.4 %)
B
	Tg-Sema7A, CNG+	Tg-Sema7A, CNG-
mature/total cells	15/18 (83.3 %)	13/16 (81.3 %)
C
	Tg-Sema7A(Y213S), CNG+	Tg-Sema7A(Y213S), CNG-
mature/total cells	3/13 (23.0 %)	2/9 (22.2 %)
