# Supplementary material for: The olfactory critical period is determined by activity-dependent Sema7A/PlxnC1 signaling within glomeruli
Source: eLife. 2021 Mar 29;10:e65078. doi: 10.7554/eLife.65078 (PMC8007213; doi:10.7554/eLife.65078)
Supplement: Figure 6—source data 1. — Mice were habituated to the cage and then a filter paper spotted with 0.5 μl of distilled water was presented for 3 min. This was repeated three times with 1 min intervals (control trials 1–3). Next, a filter paper spotted with the 1st odor was presented three times (detection trials 4–6). Then, a filter paper spotted with the 2nd odor was presented three times (detection trials 7–9). Investigation times for odors were measured in the PlxnC1 cKO and WT male mice at 6w. Odorant pairs examined are as follows: left, 6.2 M (+)-CAR and 6.4 M EUG; middle, 6.2 M (+)-CAR and 6.3 M (–)-CAR; and right, 62 mM (+)-CAR and 64 mM EUG. CAR, carvone; EUG, eugenol. The average values of investigation times are shown. [file elife-65078-fig6-data1.xlsx]

## Sheet: Fig.6A
Figure 6-source data 1
Figure 6A		Habituation/dishabituation (sec average)
	water 1	2	3		(+)-CAR 4	5	6		EUG 7	8	9
PlxnC1-cKO	0.666667	0.833333	0.666667		3.33333	1.5	1.5		4	2	1.5
WT	0.6	0.733333	0.666667		4.26667	1.06667	1.06667		7.2	1.53333	1.4
	water 1	2	3		(+)-CAR 4	5	6		(-)-CAR 7	8	9
PlxnC1-cKO	1.66667	1	1.33333		3.66667	1.5	1		1.16667	1.33333	1
WT	0.666667	1	1.2		5.06667	1.13333	1.06667		4.8	1.26667	0.6
	water 1	2	3		(+)-CAR(1/100) 4	5	6		EUG(1/100) 7	8	9
PlxnC1-cKO	1.16667	1	0.833333		1.33333	0.5	0.666667		0.666667	1	0.666667
WT	0.666667	0.8	0.666667		4.13333	1.06667	1.06667		5.4	1.6	1.2
