# Supplementary material for: The olfactory critical period is determined by activity-dependent Sema7A/PlxnC1 signaling within glomeruli
Source: eLife. 2021 Mar 29;10:e65078. doi: 10.7554/eLife.65078 (PMC8007213; doi:10.7554/eLife.65078)
Supplement: Figure 6—source data 2. — Pups of the WT and PlxnC1 cKO were exposed to VNL at P2~4 or P9~11 and analyzed at 6 w. Immediately after the transfer to a new cage, a filter paper spotted with VNL was presented to the mice. The rectal temperature was measured every 20 min in each mouse during the test. Unconditioned mice without VNL exposure (–) were analyzed as negative controls. PPA was used as an attractive-odor control (gray). Temperature differences before (T) and after (Tx) the transfer are compared. Error bars are SD (n = 3, 4, 4, 3, 3 animals). *p<0.05; ***p<0.005 (Student’s t-test). VNL, vanillin; PPA, propionic acid. [file elife-65078-fig6-data2.xlsx]

## Sheet: Fig.6D
Figure 6-source data 2
Figure 6D		Stress-induced hyperthermia
P2~4
WT(VNL)						(Tx-T)	(Tx-T)	(Tx-T)	(Tx-T)	average	SD
min		#1	#2	#3	#4	#1	#2	#3	#4
0		32.7	33.7	33.6	32.5
20		35.1	35	34.9	34.7	2.4	1.3	1.3	2.2	1.8	0.583095
40		33.7	34	33.7	33.8	1	0.3	0.1	1.3	0.675	0.567891
60		33.5	34.2	33.7	33	0.8	0.5	0.1	0.5	0.475	0.287228
P9~11
WT(VNL)						(Tx-T)	(Tx-T)	(Tx-T)	(Tx-T)	average	SD
min		#1	#2	#3	#4	#1	#2	#3	#4
0		33	32.4	32.9	32.5
20		34.5	34.1	34.1	34.9	1.5	1.7	1.2	2.4	1.7	0.509902
40		34.5	34.2	34.3	34.2	1.5	1.8	1.4	1.7	1.6	0.182574
60		33.8	32.6	33.2	33.5	0.8	0.2	0.3	1	0.575	0.386221
(-)
WT(VNL)						(Tx-T)	(Tx-T)	(Tx-T)		average	SD
min		#1	#2	#3		#1	#2	#3
0		33	32.4	33.5
20		34.8	34.3	34.8		1.8	1.9	1.3		1.66667	0.321455
40		34.3	34.9	34.8		1.3	2.5	1.3		1.7	0.69282
60		33.5	33.2	33.4		0.5	0.8	-0.1		0.4	0.458258
P2~4
PlxnC1(VNL)						(Tx-T)	(Tx-T)	(Tx-T)	(Tx-T)	average	SD
min		#1	#2	#3	#4	#1	#2	#3	#4
0		32.6	33	32.4	32.2
20		34.3	34.4	34.1	34.2	1.7	1.4	1.7	2	1.7	0.244949
40		34	34.2	34	34.1	1.4	1.2	1.6	1.9	1.525	0.298608
60		33	33.2	32.8	32.9	0.4	0.2	0.4	0.7	0.425	0.206155
P2~4
WT(PPA)						(Tx-T)	(Tx-T)	(Tx-T)		average	SD
min		#1	#2	#3		#1	#2	#3
0		33.1	33.3	33.2
20		35.1	34.9	34.8		2	1.6	1.6		1.73333	0.23094
40		34.2	34.7	34.3		1.1	1.4	1.1		1.2	0.173205
60		33.6	33.5	33.7		0.5	0.2	0.5		0.4	0.173205
