# Supplementary material for: The olfactory critical period is determined by activity-dependent Sema7A/PlxnC1 signaling within glomeruli
Source: eLife. 2021 Mar 29;10:e65078. doi: 10.7554/eLife.65078 (PMC8007213; doi:10.7554/eLife.65078)
Supplement: Figure 7—source data 1. — Sniffing times (s) were measured in the habituation/dishabituation test. The WT and Oxt KO were conditioned to 4MT at P2~4. Mice without conditioning (–) were analyzed as negative controls (n = 4 animals). Odorants used were as follows: 100 mM and 10 μM for 4MT (top); 6.4 M and 6.4 mM for EUG (bottom). The average values of total sniffing times are shown. [file elife-65078-fig7-data1.xlsx]

## Sheet: Fig.7A
Figure 7-source data 1
Figure 7A		Habituation/dishabituation (sec average)
4MT
	water 1	2	3	4MT 4	5	6		water 1	2	3	4MT(1/10000) 4	5	6
WT P2-4	0.75	0.5	0.75	4.75	3.25	2		1.25	1	1.25	3.25	2.5	1.25
Oxt KO P2-4	1	0.75	1	3	2	0.75		1	1	0.5	2	1	1
Oxt KO (-)	1.33333	1	1	3	1	1		1.33333	1	1	1.66667	0.666667	0.666667
EUG
	water 1	2	3	eug 4	5	6		water 1	water 2	water 3	eug (1/1000) 4	5	6
WT P2-4	0.25	0.5	0.5	5	1.25	1		1.5	1	1	2	1	1
Oxt KO P2-4	0.5	0.75	0.75	5	2	1.75		1.75	0.75	1	2	1.5	1.25
Oxt KO (-)	1	0.666667	0.666667	5	1.33333	1		1.66667	1.33333	1.33333	1.66667	1.66667	1.33333
