# Supplementary material for: The olfactory critical period is determined by activity-dependent Sema7A/PlxnC1 signaling within glomeruli
Source: eLife. 2021 Mar 29;10:e65078. doi: 10.7554/eLife.65078 (PMC8007213; doi:10.7554/eLife.65078)
Supplement: Figure 7—source data 2. — Pups of the WT and Oxt KO were exposed to 4MT at P2~4 and analyzed at 6w. Immediately after the transfer to a new cage, a filter paper spotted with 4MT was presented to the mice. The rectal temperature was measured every 20 min in each mouse during the test. Unconditioned mice without 4MT exposure (–) were analyzed as negative controls. Temperature differences before (T) and after (Tx) the transfer are compared. 4MT, 4-methyl-thiazole; EUG, eugenol. [file elife-65078-fig7-data2.xlsx]

## Sheet: Fig.7B
Figure 7-source data 2
Figure 7B		Stress-induced hyperthermia
P2~4
wt(4MT)						(Tx-T)	(Tx-T)	(Tx-T)	(Tx-T)	average	SD
min		#1	#2	#3	#4	#1	#2	#3	#4
0		33.4	32.8	33.2	33.1
20		34.74	34.64	34.98	34.9	1.84	0.84	1.58	2.6	1.715	0.726338
40		33.7	34	33.7	33.6	0.8	0.2	0.3	1.3	0.65	0.506623
60		33.5	33.9	33.4	33.4	0.6	0.1	0	1.1	0.45	0.506623
P2~4
Oxt KO(4MT)						(Tx-T)	(Tx-T)	(Tx-T)	(Tx-T)	average	SD
min		#1	#2	#3	#4	#1	#2	#3	#4
0		32.7	32.9	33.2	32.8
20		34.7	34.2	34.6	34.1	2.1	1.2	2.2	1.9	1.85	0.450925
40		33.9	34.6	34.5	34	1.3	1.6	2.1	1.8	1.7	0.33665
60		33	33.2	32.8	32.9	0.4	0.2	0.4	0.7	0.425	0.206155
(-)
wt(4MT)						(Tx-T)	(Tx-T)	(Tx-T)		average	SD
min		#1	#2	#3		#1	#2	#3
0		32.7	32.9	33.2
20		34.8	34.5	34.6		2.1	1.6	1.4		1.7	0.360555
40		34.6	34.3	34.5		1.9	1.4	1.3		1.53333	0.321455
60		33.6	33.6	33.4		0.9	0.7	0.2		0.6	0.360555
