# Supplementary material for: The olfactory critical period is determined by activity-dependent Sema7A/PlxnC1 signaling within glomeruli
Source: eLife. 2021 Mar 29;10:e65078. doi: 10.7554/eLife.65078 (PMC8007213; doi:10.7554/eLife.65078)
Supplement: Figure 8—source data 1. — The KO mice were administrated with oxytocin (Oxt) or saline (SAL) by intraperitoneal injection at P0~6 (A) or P8~14 (B). Time duration of sniffing are shown after the presentations of the same unfamiliar female mouse (trials 1–6). Data also show mean ± standard error. [file elife-65078-fig8-data1.xlsx]

## Sheet: Fig.8
Figure 8-source data 8
Figure 8	Social memory test
A
	trial	1	2	3	4	5	6
Oxt WT	mean
	SAL	42.4495	43.1891	30.5708	16.1735	19.649	42.2282
	Oxt	27.1414	18.4492	16.0405	11.9313	10.237	21.3565
	SE
	SAL	5.87815	6.46951	5.62605	5.23035	2.69278	2.11926
	Oxt	2.7468	3.61155	3.80725	2.86584	2.43484	2.37108
Oxt KO	mean
	SAL	38.7537	45.5029	37.1407	28.3868	28.0247	34.8441
	Oxt	37.4232	35.8743	22.3607	10.9316	6.47135	27.0579
	SE
	SAL	6.1728	2.93017	5.76739	6.39015	7.41843	5.06117
	Oxt	4.70467	3.46954	3.56717	2.63866	0.99479	4.20526
B
	trial	1	2	3	4	5	6
Oxt WT	mean
	SAL	30.8857	13.2857	10.0714	7.58571	5.77143	24.6
	Oxt	27.6	15.0162	12	6.4125	5.8	22.425
	SE
	SAL	1.84796	2.07036	1.59534	1.26744	0.903357	2.7687
	Oxt	1.9932	2.31192	1.65357	1.26511	1.84981	3.03243
Oxt KO	mean
	SAL	19.61	20.6756	16.2111	19	13.2444	16.1889
	Oxt	22.0633	23.7222	19.7356	17.2667	16.3667	19.3667
	SE
	SAL	1.64229	1.66525	2.68144	3.17219	2.70268	2.07515
	Oxt	2.61585	3.69841	4.41938	3.29478	3.57122	2.60448
